# Supplementary material for: Polypharmacy Patterns in Multimorbid Older People with Cardiovascular Disease: Longitudinal Study
Source: MDPI journal article supplement (doi:10.3390/geriatrics7060141), 2022-12-13
Supplement: s1 [file s1]

Table S1. Disease or disease-drug group prevalence in all population

| Disease or Disease-Drug Group                                | 2012          |                | 2013          |                | 2014          |                | 2015          |                | 2016          |                | Prevalence change (%) | Prevalence median (%) |
|--------------------------------------------------------------|---------------|----------------|---------------|----------------|---------------|----------------|---------------|----------------|---------------|----------------|-----------------------|-----------------------|
|                                                              | Frequency (n) | Prevalence (%) |                       |                       |
| Hypertension                                                 | 85.263        | 74             | 78.224        | 75             | 71.530        | 76             | 63.782        | 77             | 56.540        | 78             | 5,3                   | 76,4                  |
| Dyslipidaemia                                                | 47.958        | 42             | 44.176        | 42             | 40.642        | 43             | 36.123        | 44             | 31.639        | 44             | 4,8                   | 43,4                  |
| Heart failure                                                | 41.860        | 37             | 40.711        | 39             | 37.979        | 41             | 34.195        | 41             | 30.480        | 42             | 15,7                  | 40,6                  |
| Obesity (D)                                                  | 39.545        | 35             | 37.550        | 36             | 34.148        | 36             | 30.811        | 37             | 27.332        | 38             | 9,8                   | 36,5                  |
| Diabetes                                                     | 38.174        | 33             | 35.185        | 34             | 32.135        | 34             | 28.521        | 35             | 25.269        | 35             | 5,1                   | 34,3                  |
| Atrial fibrillation                                          | 33.255        | 29             | 32.188        | 31             | 30.676        | 33             | 28.126        | 34             | 25.413        | 35             | 21,4                  | 32,8                  |
| Chronic kidney disease                                       | 29.913        | 26             | 30.390        | 29             | 29.573        | 32             | 29.651        | 36             | 27.548        | 38             | 46,3                  | 31,6                  |
| Cataract lens (D)                                            | 28.289        | 25             | 27.539        | 26             | 26.674        | 28             | 25.054        | 30             | 23.198        | 32             | 30,3                  | 28,5                  |
| Osteoarthritis, degenerative joint                           | 25.400        | 22             | 23.386        | 22             | 22.742        | 24             | 21.016        | 25             | 19.335        | 27             | 20,9                  | 24,3                  |
| Ischemic heart                                               | 28.039        | 24             | 25.413        | 24             | 22.715        | 24             | 19.920        | 24             | 17.383        | 24             | -1,5                  | 24,3                  |
| COPD, emphysema, chronic bronchitis                          | 23.784        | 21             | 22.087        | 21             | 20.988        | 22             | 19.137        | 23             | 16.995        | 24             | 13,5                  | 22,4                  |
| Prostate disease disease                                     | 22.999        | 20             | 21.722        | 21             | 20.554        | 22             | 18.904        | 23             | 17.400        | 24             | 20,2                  | 22,0                  |
| Solid neoplasms (D)                                          | 21.721        | 19             | 21.094        | 20             | 20.123        | 21             | 18.783        | 23             | 17.208        | 24             | 25,8                  | 21,5                  |
| Deafness hearing loss (D)                                    | 16.956        | 15             | 17.226        | 17             | 16.926        | 18             | 16.287        | 20             | 15.382        | 21             | 44,1                  | 18,1                  |
| Colitis related diseases                                     | 19.343        | 17             | 14.033        | 14             | 13.976        | 15             | 13.472        | 16             | 12.843        | 18             | 5,4                   | 16,3                  |
| Depression and mood diseases                                 | 15.584        | 14             | 14.939        | 14             | 14.024        | 15             | 12.680        | 15             | 11.519        | 16             | 17,4                  | 15,0                  |
| Peripheral vascular disease                                  | 15.364        | 13             | 14.871        | 14             | 13.868        | 15             | 12.686        | 15             | 11.569        | 16             | 19,6                  | 14,8                  |
| Cerebrovascular disease                                      | 16.940        | 15             | 15.783        | 15             | 14.008        | 15             | 12.115        | 15             | 9.925         | 14             | -6,9                  | 14,8                  |
| Bradycardias and conduction diseases (D)                     | 13.423        | 12             | 13.754        | 13             | 13.543        | 14             | 12.853        | 16             | 11.916        | 17             | 41,0                  | 14,5                  |
| Anaemia                                                      | 14.954        | 13             | 13.523        | 13             | 12.843        | 14             | 11.815        | 14             | 10.556        | 15             | 12,1                  | 13,7                  |
| Cardiac valve diseases                                       | 12.816        | 11             | 12.442        | 12             | 12.413        | 13             | 11.800        | 14             | 10.807        | 15             | 34,0                  | 13,3                  |
| Neurotic, stress-related and somatoform diseases             | 12.328        | 11             | 11.920        | 11             | 11.671        | 12             | 10.969        | 13             | 10.303        | 14             | 32,7                  | 12,5                  |
| Dorsopathies                                                 | 10.615        | 9              | 10.213        | 10             | 10.364        | 11             | 10.036        | 12             | 9.537         | 13             | 42,7                  | 11,1                  |
| Sleep disorders                                              | 8.324         | 7              | 9.268         | 9              | 9.868         | 11             | 9.700         | 12             | 9.092         | 13             | 73,5                  | 10,5                  |
| Esophagus, stomach and duodenum diseases                     | 9.022         | 8              | 8.902         | 9              | 9.097         | 10             | 8.879         | 11             | 8.815         | 12             | 55,2                  | 9,7                   |
| Other musculoskeletal and joint diseases                     | 9.499         | 8              | 9.045         | 9              | 8.992         | 10             | 8.649         | 10             | 8.292         | 12             | 38,7                  | 9,6                   |
| Glaucoma                                                     | 8.446         | 7              | 7.810         | 8              | 7.357         | 8              | 6.686         | 8              | 6.023         | 8              | 13,1                  | 7,9                   |
| Other psychiatric and behavioral diseases                    | 5.933         | 5              | 6.333         | 6              | 6.615         | 7              | 6.579         | 8              | 6.396         | 9              | 71,2                  | 7,1                   |
| Dementia                                                     | 6.465         | 6              | 6.378         | 6              | 6.133         | 7              | 5.619         | 7              | 5.184         | 7              | 27,3                  | 6,6                   |
| Thyroid diseases                                             | 6.461         | 6              | 6.257         | 6              | 5.786         | 6              | 5.446         | 7              | 5.024         | 7              | 23,6                  | 6,2                   |
| Peripheral neuropathy                                        | 5.538         | 5              | 5.422         | 5              | 5.494         | 6              | 5.477         | 7              | 5.264         | 7              | 50,8                  | 5,9                   |
| Osteoporosis                                                 | 8.178         | 7              | 6.002         | 6              | 4.991         | 5              | 4.365         | 5              | 3.772         | 5              | -26,8                 | 5,3                   |
| Other cardiovascular diseases (D)                            | 5.007         | 4              | 5.038         | 5              | 4.924         | 5              | 4.684         | 6              | 4.293         | 6              | 36,2                  | 5,3                   |
| Chronic pancreas, biliary tract and gallbladder diseases (D) | 4.387         | 4              | 4.448         | 4              | 4.374         | 5              | 4.292         | 5              | 4.057         | 6              | 47,0                  | 4,7                   |
| Inflammatory arthropathies                                   | 4.348         | 4              | 4.177         | 4              | 4.213         | 5              | 4.215         | 5              | 4.061         | 6              | 48,2                  | 4,5                   |
| Other digestive diseases (D)                                 | 3.496         | 3              | 3.482         | 3              | 3.501         | 4              | 3.365         | 4              | 3.140         | 4              | 43,0                  | 3,7                   |
| Other genitourinary diseases                                 | 3.691         | 3              | 3.514         | 3              | 3.179         | 3              | 3.067         | 4              | 2.913         | 4              | 25,5                  | 3,4                   |
| Other respiratory diseases (D)                               | 2.651         | 2              | 2.812         | 3              | 2.967         | 3              | 2.959         | 4              | 2.892         | 4              | 73,6                  | 3,2                   |
| Autoimmune diseases                                          | 2.551         | 2              | 2.369         | 2              | 2.372         | 3              | 2.289         | 3              | 2.166         | 3              | 34,5                  | 2,5                   |
| Other skin diseases (D)                                      | 2.258         | 2              | 2.341         | 2              | 2.366         | 3              | 2.178         | 3              | 2.018         | 3              | 42,1                  | 2,5                   |
| Allergy                                                      | 1.807         | 2              | 1.955         | 2              | 2.085         | 2              | 2.209         | 3              | 2.131         | 3              | 87,3                  | 2,2                   |

Abbreviations: COPD: chronic obstructive pulmonary; IQR: interquartile range. D: Disease category (all other groups correspond to disease-drug).

Categories highlighted in blue correspond to *Disease category*
