# Supplementary material for: Polypharmacy Patterns in Multimorbid Older People with Cardiovascular Disease: Longitudinal Study
Source: MDPI journal article supplement (doi:10.3390/geriatrics7060141), 2022-12-13
Supplement: s1 [file s1]

Table S4. Transition probabilities for Viterbi decoding from start to end of study

| <div>2016</div> <div>2012</div>                                                 | Cardiac | Non-specific | Mental, Behavioural, digestive & cerebrovascular | Neuropathy, autoimmune & musculoskeletal | Multisystemic | Respiratory, cardiovascular, Behavioural & genitourinary | Diabetes & ischemic cardiopathy | Musculoskeletal, mental, Behavioural, genitourinary, digestive & dermatological | Transfer out | Death |
|---------------------------------------------------------------------------------|---------|--------------|--------------------------------------------------|------------------------------------------|---------------|----------------------------------------------------------|---------------------------------|---------------------------------------------------------------------------------|--------------|-------|
| Cardiac                                                                         | 67,27   | 0,77         | 0,4                                              | 1,21                                     | 1,54          | 0,02                                                     | 0,16                            | 0,98                                                                            | 1,18         | 26,48 |
| Non-specific                                                                    | 2,59    | 42,06        | 3,94                                             | 0,63                                     | 2,27          | 2,37                                                     | 1,17                            | 3,17                                                                            | 4,97         | 36,82 |
| Mental, Behavioural, digestive & cerebrovascular                                | 0,11    | 3,05         | 33,3                                             | 0,03                                     | 0,17          | 0,06                                                     | 0,1                             | 0,14                                                                            | 2,84         | 60,2  |
| Neuropathy, autoimmune & musculoskeletal                                        | 1,8     | 1,09         | 0,32                                             | 68,11                                    | 1,4           | 0,13                                                     | 3,86                            | 0,3                                                                             | 1,1          | 21,9  |
| Multisystemic                                                                   | 0,35    | 1,04         | 0,2                                              | 0,12                                     | 54,04         | 0,06                                                     | 0,27                            | 0,26                                                                            | 1,58         | 42,08 |
| Respiratory, cardiovascular, Behavioural & genitourinary                        | 0,11    | 1,13         | 0,13                                             | 0,07                                     | 1,1           | 70,39                                                    | 0,94                            | 0,35                                                                            | 1,08         | 24,69 |
| Diabetes & ischemic cardiopathy                                                 | 0,83    | 1,2          | 1,08                                             | 2,84                                     | 2,3           | 2,22                                                     | 57,95                           | 0,67                                                                            | 0,98         | 29,93 |
| Musculoskeletal, mental, Behavioural, genitourinary, digestive & dermatological | 1,42    | 4,5          | 1,09                                             | 0,25                                     | 1,29          | 0,25                                                     | 0,34                            | 60,68                                                                           | 1,83         | 28,36 |

Note: Patterns for 2012 are shown vertically and 2016 horizontally. Patterns shaded in grey correspond to transfer out and dead. Patterns shaded in red correspond to the most frequent transitions
