# Supplementary material for: Polypharmacy Patterns in Multimorbid Older People with Cardiovascular Disease: Longitudinal Study
Source: MDPI journal article supplement (doi:10.3390/geriatrics7060141), 2022-12-13
Supplement: s1 [file s1]

Table S3. Evolution of combined multimorbidity and polypharmacy patterns identified, people included and diseases or diseases-drug group

| Baseline (2012) |                                           |         |       |        | End of follow-up (2016) |                                           |         |       |        |
|-----------------|-------------------------------------------|---------|-------|--------|-------------------------|-------------------------------------------|---------|-------|--------|
| Pattern         | Disease or Disease-Drug Group             | Prev C1 | OE C1 | Exc C1 | Pattern                 | Disease or Disease-Drug Group             | Prev C1 | OE C1 | Exc C1 |
| Cardiac         | Cardiac valve diseases                    | 64,75   | 5,79  | 73,42  | Cardiac                 | Cardiac valve diseases                    | 68,35   | 4,56  | 70,49  |
|                 | Atrial fibrillation                       | 88,41   | 3,04  | 38,63  |                         | Atrial fibrillation                       | 91,77   | 2,60  | 40,25  |
|                 | Heart failure                             | 56,95   | 1,56  | 19,77  |                         | Heart failure                             | 61,88   | 1,46  | 22,62  |
|                 | Thyroid diseases                          | 8,60    | 1,52  | 19,35  |                         | Thyroid                                   | 10,05   | 1,44  | 22,29  |
|                 | Inflammatory arthropathies                | 5,29    | 1,39  | 17,69  |                         | Inflammatory arthropathies                | 7,45    | 1,32  | 20,44  |
|                 | Obesity (D)                               | 38,76   | 1,12  | 14,24  |                         | Obesity (D)                               | 40,92   | 1,08  | 16,68  |
|                 | Other cardiovascular diseases (D)         | 4,88    | 1,12  | 14,16  |                         | Hypertension                              | 82,85   | 1,06  | 16,33  |
|                 | Hypertension                              | 81,17   | 1,09  | 13,83  |                         | Chronic kidney                            | 40,07   | 1,05  | 16,21  |
|                 | Osteoporosis                              | 7,43    | 1,04  | 13,21  |                         | Osteoporosis                              | 5,26    | 1,00  | 15,54  |
|                 | Chronic kidney diseases                   | 26,83   | 1,03  | 13,03  |                         | Chronic pancreas, biliary-gallbladder (D) | 5,65    | 1,00  | 15,53  |
|                 | Dyslipidaemia                             | 40,81   | 0,97  | 12,37  |                         | Other cardiovascular diseases (D)         | 5,64    | 0,95  | 14,65  |
|                 | Chronic pancreas, biliary-gallbladder (D) | 3,65    | 0,95  | 12,10  |                         | Dyslipidaemia                             | 41,17   | 0,94  | 14,50  |
|                 | Solid neoplasms (D)                       | 17,69   | 0,93  | 11,84  |                         | Solid neoplasms (D)                       | 21,62   | 0,91  | 14,00  |
|                 | Other skin (D)                            | 1,71    | 0,87  | 10,98  |                         | Bradycardias conduction (D)               | 14,08   | 0,85  | 13,17  |
|                 | Esophagus stomach duodenum                | 6,81    | 0,86  | 10,97  |                         | Cataract lens (D)                         | 27,04   | 0,84  | 12,99  |
|                 | COPD, emphysema, chronic bronchitis       | 17,06   | 0,82  | 10,43  |                         | Other skin (D)                            | 2,30    | 0,82  | 12,69  |
|                 | Bradycardias conduction (D)               | 9,47    | 0,81  | 10,25  |                         | COPD, emphysema, chronic bronchitis       | 17,93   | 0,76  | 11,76  |
|                 | Anaemia                                   | 10,46   | 0,80  | 10,16  |                         | Anaemia                                   | 11,10   | 0,76  | 11,72  |
|                 | Cataract lens (D)                         | 18,33   | 0,74  | 9,42   |                         | Esophagus stomach duodenum                | 9,10    | 0,74  | 11,50  |
|                 | Diabetes                                  | 23,57   | 0,71  | 8,97   |                         | Glaucoma                                  | 6,16    | 0,74  | 11,41  |
| Pattern         | Disease or Disease-Drug Group             | Prev C1 | OE C1 | Exc C1 | Pattern                 | Disease or Disease-Drug Group             | Prev C1 | OE C1 | Exc C1 |
| Non-specific    | Bradycardias conduction (D)               | 14,14   | 1,21  | 41,64  | Non-specific            | Bradycardias conduction (D)               | 20,07   | 1,21  | 29,89  |
|                 | Deafness hearing loss (D)                 | 15,19   | 1,03  | 35,40  |                         | Deafness hearing loss (D)                 | 22,18   | 1,04  | 25,59  |
|                 | Other digestive (D)                       | 3,11    | 1,02  | 35,15  |                         | Cataract lens (D)                         | 30,01   | 0,93  | 22,96  |
|                 | Cataract lens (D)                         | 24,00   | 0,97  | 33,53  |                         | Solid neoplasms (D)                       | 20,85   | 0,87  | 21,50  |
|                 | Solid neoplasms (D)                       | 17,00   | 0,90  | 30,95  |                         | Heart failure                             | 35,09   | 0,83  | 20,44  |
|                 | Heart failure                             | 31,47   | 0,86  | 29,72  |                         | Other digestive (D)                       | 3,58    | 0,82  | 20,22  |
|                 | Hypertension                              | 60,03   | 0,81  | 27,83  |                         | Hypertension                              | 63,92   | 0,82  | 20,07  |
|                 | Cerebrovascular                           | 11,40   | 0,77  | 26,59  |                         | Osteoporosis                              | 3,91    | 0,75  | 18,40  |
|                 | Osteoporosis                              | 5,34    | 0,75  | 25,79  |                         | Peripheral vascular                       | 11,96   | 0,75  | 18,35  |
|                 | Glaucoma                                  | 5,49    | 0,74  | 25,69  |                         | Cerebrovascular                           | 10,24   | 0,74  | 18,32  |
|                 | Peripheral vascular                       | 9,91    | 0,74  | 25,50  |                         | Glaucoma                                  | 6,14    | 0,74  | 18,10  |
|                 | Atrial fibrillation                       | 21,34   | 0,73  | 25,37  |                         | Prostate                                  | 17,40   | 0,72  | 17,75  |
|                 | Prostate                                  | 14,48   | 0,72  | 24,88  |                         | Ischemic heart                            | 16,99   | 0,70  | 17,34  |
|                 | Osteoarthritis, degenerative joint        | 15,79   | 0,71  | 24,57  |                         | Chronic kidney                            | 25,94   | 0,68  | 16,71  |
|                 | Obesity (D)                               | 23,37   | 0,68  | 23,37  |                         | Atrial fibrillation                       | 23,88   | 0,68  | 16,68  |
|                 | Ischemic heart                            | 16,56   | 0,68  | 23,35  |                         | Osteoarthritis, degenerative joint        | 17,60   | 0,66  | 16,16  |
|                 | COPD, emphysema, chronic bronchitis       | 14,00   | 0,67  | 23,27  |                         | Obesity (D)                               | 24,57   | 0,65  | 15,96  |
|                 | Chronic kidney                            | 17,18   | 0,66  | 22,71  |                         | COPD, emphysema, chronic bronchitis       | 14,72   | 0,62  | 15,37  |
|                 | Colitis related diseases                  | 11,08   | 0,66  | 22,64  |                         | Colitis related diseases                  | 10,75   | 0,60  | 14,86  |
|                 | Dyslipidaemia                             | 24,92   | 0,60  | 20,54  |                         | Dyslipidaemia                             | 26,01   | 0,59  | 14,59  |

| Baseline (2012)                                  |                                           |         |       |        | End of follow-up (2016)                          |                                           |         |       |        |
|--------------------------------------------------|-------------------------------------------|---------|-------|--------|--------------------------------------------------|-------------------------------------------|---------|-------|--------|
| Pattern                                          | Disease or Disease-Drug Group             | Prev C1 | OE C1 | Exc C1 | Pattern                                          | Disease or Disease-Drug Group             | Prev C1 | OE C1 | Exc C1 |
| Mental, behavioural, digestive & cerebrovascular | Dementia                                  | 48,96   | 8,67  | 67,69  | Mental, behavioural, digestive & cerebrovascular | Dementia                                  | 57,70   | 8,02  | 52,95  |
|                                                  | Depression mood                           | 48,20   | 3,54  | 27,64  |                                                  | Other digestive (D)                       | 17,87   | 4,10  | 27,07  |
|                                                  | Other digestive (D)                       | 10,43   | 3,42  | 26,66  |                                                  | Depression mood                           | 49,91   | 3,12  | 20,61  |
|                                                  | Other psychiatric and behavioural         | 14,05   | 2,71  | 21,17  |                                                  | Other psychiatric and behavioural         | 24,24   | 2,73  | 18,03  |
|                                                  | Neurotic, stress and somatoform           | 28,43   | 2,64  | 20,61  |                                                  | Neurotic, stress and somatoform           | 29,58   | 2,07  | 13,66  |
|                                                  | Anaemia                                   | 33,21   | 2,54  | 19,85  |                                                  | Anaemia                                   | 30,29   | 2,07  | 13,65  |
|                                                  | Cerebrovascular                           | 30,18   | 2,04  | 15,92  |                                                  | Cerebrovascular                           | 27,50   | 2,00  | 13,18  |
|                                                  | Colitis related diseases                  | 30,97   | 1,83  | 14,31  |                                                  | Chronic pancreas, biliary-gallbladder (D) | 8,66    | 1,54  | 10,16  |
|                                                  | Chronic pancreas, biliary-gallbladder (D) | 6,99    | 1,83  | 14,25  |                                                  | Colitis related diseases                  | 23,50   | 1,32  | 8,71   |
|                                                  | Autoimmune                                | 3,70    | 1,66  | 12,98  |                                                  | Chronic kidney                            | 48,48   | 1,27  | 8,37   |
|                                                  | Chronic kidney                            | 39,45   | 1,51  | 11,79  |                                                  | Glaucoma                                  | 10,51   | 1,26  | 8,30   |
|                                                  | Sleep                                     | 10,53   | 1,45  | 11,30  |                                                  | Autoimmune                                | 3,51    | 1,17  | 7,71   |
|                                                  | Glaucoma                                  | 10,09   | 1,37  | 10,68  |                                                  | Sleep                                     | 14,23   | 1,13  | 7,45   |
|                                                  | Diabetes                                  | 39,52   | 1,19  | 9,25   |                                                  | Diabetes                                  | 38,28   | 1,09  | 7,21   |
|                                                  | Osteoarthritis, degenerative joint        | 23,93   | 1,08  | 8,42   |                                                  | Thyroid                                   | 7,21    | 1,03  | 6,83   |
|                                                  | Hypertension                              | 80,13   | 1,08  | 8,40   |                                                  | Hypertension                              | 79,40   | 1,01  | 6,68   |
|                                                  | Osteoporosis                              | 7,65    | 1,07  | 8,36   |                                                  | Osteoarthritis, degenerative joint        | 27,10   | 1,01  | 6,67   |
|                                                  | Thyroid                                   | 5,96    | 1,06  | 8,25   |                                                  | Solid neoplasms (D)                       | 23,10   | 0,97  | 6,39   |
|                                                  | Solid neoplasms (D)                       | 19,66   | 1,04  | 8,09   |                                                  | Osteoporosis                              | 4,88    | 0,93  | 6,15   |
|                                                  | Cataract lens (D)                         | 25,09   | 1,02  | 7,93   |                                                  | Cataract lens (D)                         | 29,68   | 0,92  | 6,09   |
| Pattern                                          | Disease or Disease-Drug Group             | Prev C1 | OE C1 | Exc C1 | Pattern                                          | Disease or Disease-Drug Group             | Prev C1 | OE C1 | Exc C1 |
| Neuropathy, autoimmune & musculoskeletal         | Peripheral neuropathy                     | 42,48   | 8,78  | 38,37  | Neuropathy, autoimmune & musculoskeletal         | Peripheral neuropathy                     | 46,28   | 6,34  | 38,62  |
|                                                  | Autoimmune                                | 16,39   | 7,36  | 32,14  |                                                  | Autoimmune                                | 17,76   | 5,91  | 36,01  |
|                                                  | Other musculoskeletal joint               | 37,45   | 4,51  | 19,72  |                                                  | Other musculoskeletal joint               | 40,97   | 3,56  | 21,71  |
|                                                  | Dorsopathies                              | 41,28   | 4,45  | 19,45  |                                                  | Dorsopathies                              | 47,05   | 3,56  | 21,67  |
|                                                  | Osteoarthritis, degenerative joint        | 62,00   | 2,80  | 12,21  |                                                  | Osteoarthritis, degenerative joint        | 66,15   | 2,47  | 15,03  |
|                                                  | Osteoporosis                              | 17,51   | 2,45  | 10,71  |                                                  | Osteoporosis                              | 12,22   | 2,34  | 14,24  |
|                                                  | Inflammatory arthropathies                | 8,20    | 2,16  | 9,43   |                                                  | Inflammatory arthropathies                | 9,88    | 1,75  | 10,69  |
|                                                  | Obesity (D)                               | 63,01   | 1,82  | 7,97   |                                                  | Diabetes                                  | 58,82   | 1,68  | 10,23  |
|                                                  | Diabetes                                  | 59,12   | 1,77  | 7,75   |                                                  | Obesity (D)                               | 63,37   | 1,67  | 10,19  |
|                                                  | Anaemia                                   | 21,51   | 1,65  | 7,20   |                                                  | Anaemia                                   | 23,90   | 1,63  | 9,95   |
|                                                  | Dyslipidaemia                             | 60,56   | 1,45  | 6,32   |                                                  | Thyroid                                   | 9,74    | 1,40  | 8,52   |
|                                                  | Depression mood                           | 19,23   | 1,41  | 6,17   |                                                  | Peripheral vascular                       | 21,83   | 1,36  | 8,29   |
|                                                  | Peripheral vascular                       | 18,57   | 1,38  | 6,05   |                                                  | Depression mood                           | 21,56   | 1,35  | 8,22   |
|                                                  | Neurotic, stress and somatoform           | 14,65   | 1,36  | 5,95   |                                                  | Dyslipidaemia                             | 59,16   | 1,35  | 8,21   |
|                                                  | Thyroid                                   | 7,60    | 1,35  | 5,88   |                                                  | Chronic kidney                            | 49,51   | 1,30  | 7,90   |
|                                                  | Chronic kidney                            | 34,53   | 1,32  | 5,77   |                                                  | Neurotic, stress and somatoform           | 18,05   | 1,26  | 7,70   |
|                                                  | Ischemic heart                            | 29,71   | 1,21  | 5,30   |                                                  | Heart failure                             | 51,83   | 1,23  | 7,47   |
|                                                  | Hypertension                              | 89,66   | 1,20  | 5,26   |                                                  | Ischemic heart                            | 29,11   | 1,21  | 7,36   |
|                                                  | Glaucoma                                  | 8,80    | 1,19  | 5,21   |                                                  | Glaucoma                                  | 9,74    | 1,17  | 7,11   |
|                                                  | Heart failure                             | 42,08   | 1,15  | 5,03   |                                                  | Hypertension                              | 90,76   | 1,16  | 7,05   |

| Baseline (2012)                                          |                                           |         |       |        | End of follow-up (2016)                                  |                                           |         |       |        |
|----------------------------------------------------------|-------------------------------------------|---------|-------|--------|----------------------------------------------------------|-------------------------------------------|---------|-------|--------|
| Pattern                                                  | Disease or Disease-Drug Group             | Prev C1 | OE C1 | Exc C1 | Pattern                                                  | Disease or Disease-Drug Group             | Prev C1 | OE C1 | Exc C1 |
| Multisystemic                                            | Chronic pancreas, biliary-gallbladder (D) | 27,74   | 7,24  | 37,50  | Multisystemic                                            | Chronic pancreas, biliary-gallbladder (D) | 31,01   | 5,51  | 38,45  |
|                                                          | Inflammatory arthropathies                | 25,48   | 6,71  | 34,75  |                                                          | Inflammatory arthropathies                | 27,83   | 4,94  | 34,47  |
|                                                          | Other respiratory (D)                     | 11,01   | 4,76  | 24,63  |                                                          | Other respiratory (D)                     | 13,52   | 3,37  | 23,51  |
|                                                          | Other cardiovascular diseases (D)         | 17,22   | 3,94  | 20,39  |                                                          | Autoimmune                                | 8,75    | 2,91  | 20,31  |
|                                                          | Autoimmune                                | 8,58    | 3,85  | 19,95  |                                                          | Other cardiovascular diseases (D)         | 17,21   | 2,89  | 20,17  |
|                                                          | Other digestive (D)                       | 9,36    | 3,07  | 15,88  |                                                          | Other digestive (D)                       | 12,03   | 2,76  | 19,27  |
|                                                          | Bradycardias conduction (D)               | 31,57   | 2,69  | 13,95  |                                                          | Bradycardias conduction (D)               | 38,54   | 2,33  | 16,27  |
|                                                          | Peripheral neuropathy                     | 10,58   | 2,19  | 11,32  |                                                          | Dorsopathies                              | 23,63   | 1,79  | 12,47  |
|                                                          | Dorsopathies                              | 19,67   | 2,12  | 10,98  |                                                          | Osteoarthritis, degenerative joint        | 46,95   | 1,75  | 12,22  |
|                                                          | Other genitourinary                       | 6,53    | 2,03  | 10,48  |                                                          | Peripheral neuropathy                     | 12,72   | 1,74  | 12,16  |
|                                                          | Osteoarthritis, degenerative joint        | 43,11   | 1,94  | 10,06  |                                                          | Other genitourinary                       | 6,98    | 1,73  | 12,05  |
|                                                          | COPD, emphysema, chronic bronchitis       | 38,66   | 1,86  | 9,64   |                                                          | COPD, emphysema, chronic bronchitis       | 38,96   | 1,65  | 11,53  |
|                                                          | Other musculoskeletal joint               | 15,37   | 1,85  | 9,59   |                                                          | Heart failure                             | 68,79   | 1,63  | 11,35  |
|                                                          | Chronic kidney                            | 47,06   | 1,80  | 9,33   |                                                          | Anaemia                                   | 23,79   | 1,62  | 11,34  |
|                                                          | Allergy                                   | 2,78    | 1,76  | 9,13   |                                                          | Other musculoskeletal joint               | 18,64   | 1,62  | 11,31  |
|                                                          | Anaemia                                   | 22,43   | 1,72  | 8,89   |                                                          | Allergy                                   | 4,75    | 1,61  | 11,22  |
|                                                          | Heart failure                             | 62,35   | 1,71  | 8,83   |                                                          | Chronic kidney                            | 61,30   | 1,60  | 11,20  |
|                                                          | Other skin (D)                            | 3,17    | 1,61  | 8,33   |                                                          | Sleep                                     | 18,58   | 1,47  | 10,28  |
|                                                          | Sleep                                     | 11,62   | 1,60  | 8,28   |                                                          | Colitis related diseases                  | 26,24   | 1,47  | 10,28  |
|                                                          | Colitis related diseases                  | 25,22   | 1,49  | 7,73   |                                                          | Atrial fibrillation                       | 47,31   | 1,34  | 9,37   |
| Pattern                                                  | Disease or Disease-Drug Group             | Prev C1 | OE C1 | Exc C1 | Pattern                                                  | Disease or Disease-Drug Group             | Prev C1 | OE C1 | Exc C1 |
| Respiratory, cardiovascular, behavioural & genitourinary | Allergy                                   | 8,35    | 5,29  | 56,72  | Respiratory, cardiovascular, behavioural & genitourinary | Allergy                                   | 11,61   | 3,93  | 54,62  |
|                                                          | Other respiratory (D)                     | 9,45    | 4,08  | 43,72  |                                                          | Other cardiovascular diseases (D)         | 19,41   | 3,26  | 45,33  |
|                                                          | Other cardiovascular diseases (D)         | 17,46   | 3,99  | 42,78  |                                                          | Other respiratory (D)                     | 12,24   | 3,05  | 42,43  |
|                                                          | Other psychiatric and behavioural         | 20,38   | 3,93  | 42,15  |                                                          | Other psychiatric and behavioural         | 23,78   | 2,68  | 37,27  |
|                                                          | Prostate                                  | 48,33   | 2,41  | 25,78  |                                                          | Prostate                                  | 51,75   | 2,14  | 29,81  |
|                                                          | COPD, emphysema, chronic bronchitis       | 44,63   | 2,15  | 23,02  |                                                          | Other genitourinary                       | 8,14    | 2,01  | 28,01  |
|                                                          | Peripheral vascular                       | 27,64   | 2,06  | 22,07  |                                                          | COPD, emphysema, chronic bronchitis       | 46,31   | 1,96  | 27,31  |
|                                                          | Other skin (D)                            | 3,93    | 1,99  | 21,35  |                                                          | Peripheral vascular                       | 31,12   | 1,94  | 26,96  |
|                                                          | Esophagus stomach duodenum                | 14,58   | 1,85  | 19,83  |                                                          | Other skin (D)                            | 4,97    | 1,77  | 24,68  |
|                                                          | Sleep                                     | 12,80   | 1,76  | 18,87  |                                                          | Esophagus stomach duodenum                | 19,16   | 1,57  | 21,79  |
|                                                          | Other genitourinary                       | 5,22    | 1,62  | 17,34  |                                                          | Sleep                                     | 18,64   | 1,48  | 20,55  |
|                                                          | Solid neoplasms (D)                       | 29,61   | 1,56  | 16,73  |                                                          | Solid neoplasms (D)                       | 34,62   | 1,45  | 20,17  |
|                                                          | Deafness hearing loss (D)                 | 21,30   | 1,44  | 15,42  |                                                          | Ischemic heart                            | 34,50   | 1,43  | 19,89  |
|                                                          | Neurotic, stress and somatoform           | 15,24   | 1,42  | 15,17  |                                                          | Deafness hearing loss (D)                 | 28,93   | 1,36  | 18,85  |
|                                                          | Ischemic heart                            | 34,10   | 1,39  | 14,92  |                                                          | Colitis related diseases                  | 24,13   | 1,35  | 18,84  |
|                                                          | Colitis related diseases                  | 21,77   | 1,29  | 13,81  |                                                          | Cerebrovascular                           | 18,06   | 1,31  | 18,24  |
|                                                          | Other musculoskeletal joint               | 10,50   | 1,27  | 13,56  |                                                          | Neurotic, stress and somatoform           | 18,51   | 1,29  | 18,00  |
|                                                          | Cerebrovascular                           | 18,66   | 1,26  | 13,51  |                                                          | Chronic pancreas, biliary-gallbladder (D) | 7,15    | 1,27  | 17,67  |
|                                                          | Inflammatory arthropathies                | 4,73    | 1,24  | 13,34  |                                                          | Dyslipidaemia                             | 53,11   | 1,21  | 16,83  |
|                                                          | Dyslipidaemia                             | 51,59   | 1,23  | 13,20  |                                                          | Depression mood                           | 19,00   | 1,19  | 16,54  |

| Baseline (2012)                                                                 |                                     |         |       |        | End of follow-up (2016)                                                         |                                    |         |       |        |
|---------------------------------------------------------------------------------|-------------------------------------|---------|-------|--------|---------------------------------------------------------------------------------|------------------------------------|---------|-------|--------|
| Pattern                                                                         | Disease or Disease-Drug Group       | Prev C1 | OE C1 | Exc C1 | Pattern                                                                         | Disease or Disease-Drug Group      | Prev C1 | OE C1 | Exc C1 |
| Diabetes & ischemic cardiopathy                                                 | Diabetes                            | 71,00   | 2,13  | 36,45  | Diabetes & ischemic cardiopathy                                                 | Ischemic heart                     | 49,55   | 2,05  | 34,55  |
|                                                                                 | Ischemic heart                      | 50,95   | 2,08  | 35,61  |                                                                                 | Diabetes                           | 71,14   | 2,03  | 34,13  |
|                                                                                 | Peripheral vascular                 | 26,79   | 2,00  | 34,18  |                                                                                 | Peripheral vascular                | 31,89   | 1,99  | 33,42  |
|                                                                                 | Other genitourinary                 | 6,41    | 1,99  | 34,06  |                                                                                 | Other genitourinary                | 7,25    | 1,79  | 30,18  |
|                                                                                 | Thyroid                             | 9,99    | 1,77  | 30,30  |                                                                                 | Cerebrovascular                    | 22,90   | 1,66  | 27,97  |
|                                                                                 | Glaucoma                            | 12,73   | 1,73  | 29,54  |                                                                                 | Glaucoma                           | 13,67   | 1,64  | 27,51  |
|                                                                                 | Dyslipidaemia                       | 72,11   | 1,72  | 29,47  |                                                                                 | Dyslipidaemia                      | 70,79   | 1,61  | 27,12  |
|                                                                                 | Cerebrovascular                     | 23,78   | 1,61  | 27,52  |                                                                                 | Thyroid                            | 10,68   | 1,53  | 25,78  |
|                                                                                 | Other skin (D)                      | 3,08    | 1,56  | 26,75  |                                                                                 | Other skin (D)                     | 3,98    | 1,42  | 23,89  |
|                                                                                 | Chronic kidney                      | 39,36   | 1,51  | 25,79  |                                                                                 | Anaemia                            | 20,31   | 1,39  | 23,32  |
|                                                                                 | Anaemia                             | 18,51   | 1,42  | 24,26  |                                                                                 | Chronic kidney                     | 52,53   | 1,37  | 23,12  |
|                                                                                 | Obesity (D)                         | 48,11   | 1,39  | 23,85  |                                                                                 | Obesity (D)                        | 48,90   | 1,29  | 21,69  |
|                                                                                 | Hypertension                        | 93,43   | 1,25  | 21,48  |                                                                                 | Hypertension                       | 93,94   | 1,20  | 20,14  |
|                                                                                 | Esophagus stomach duodenum          | 9,44    | 1,20  | 20,51  |                                                                                 | Esophagus stomach duodenum         | 14,20   | 1,16  | 19,52  |
|                                                                                 | Prostate                            | 21,16   | 1,05  | 18,03  |                                                                                 | Cataract lens (D)                  | 33,81   | 1,05  | 17,67  |
|                                                                                 | Cataract lens (D)                   | 24,91   | 1,01  | 17,26  |                                                                                 | Prostate                           | 25,32   | 1,05  | 17,64  |
|                                                                                 | Solid neoplasms (D)                 | 18,52   | 0,98  | 16,72  |                                                                                 | Solid neoplasms (D)                | 23,85   | 1,00  | 16,80  |
|                                                                                 | Heart failure                       | 35,58   | 0,97  | 16,66  |                                                                                 | Colitis related diseases           | 17,07   | 0,96  | 16,11  |
|                                                                                 | Colitis related diseases            | 16,12   | 0,95  | 16,33  |                                                                                 | Heart failure                      | 39,80   | 0,94  | 15,83  |
|                                                                                 | COPD, emphysema, chronic bronchitis | 17,86   | 0,86  | 14,72  |                                                                                 | Deafness hearing loss (D)          | 18,31   | 0,86  | 14,43  |
| Pattern                                                                         | Disease or Disease-Drug Group       | Prev C1 | OE C1 | Exc C1 | Pattern                                                                         | Disease or Disease-Drug Group      | Prev C1 | OE C1 | Exc C1 |
| Musculoskeletal, mental, behavioural, genitourinary, digestive & dermatological | Neurotic, stress and somatoform     | 43,42   | 4,03  | 30,69  | Musculoskeletal, mental, behavioural, genitourinary, digestive & dermatological | Neurotic, stress and somatoform    | 47,99   | 3,36  | 32,00  |
|                                                                                 | Dorsopathies                        | 34,48   | 3,72  | 28,31  |                                                                                 | Dorsopathies                       | 38,30   | 2,89  | 27,59  |
|                                                                                 | Other musculoskeletal joint         | 27,86   | 3,36  | 25,56  |                                                                                 | Depression mood                    | 46,11   | 2,89  | 27,50  |
|                                                                                 | Depression mood                     | 44,53   | 3,27  | 24,90  |                                                                                 | Osteoporosis                       | 14,57   | 2,78  | 26,54  |
|                                                                                 | Sleep                               | 23,24   | 3,20  | 24,33  |                                                                                 | Other musculoskeletal joint        | 31,06   | 2,70  | 25,74  |
|                                                                                 | Osteoporosis                        | 22,58   | 3,16  | 24,06  |                                                                                 | Sleep                              | 32,34   | 2,56  | 24,44  |
|                                                                                 | Other genitourinary                 | 9,23    | 2,86  | 21,78  |                                                                                 | Osteoarthritis, degenerative joint | 59,27   | 2,21  | 21,06  |
|                                                                                 | Esophagus stomach duodenum          | 20,94   | 2,66  | 20,23  |                                                                                 | Esophagus stomach duodenum         | 25,62   | 2,10  | 19,97  |
|                                                                                 | Osteoarthritis, degenerative joint  | 56,68   | 2,56  | 19,44  |                                                                                 | Other skin (D)                     | 5,69    | 2,03  | 19,38  |
|                                                                                 | Other skin (D)                      | 4,92    | 2,50  | 19,00  |                                                                                 | Thyroid                            | 14,08   | 2,02  | 19,25  |
|                                                                                 | Thyroid                             | 12,62   | 2,24  | 17,03  |                                                                                 | Other psychiatric and behavioural  | 16,49   | 1,86  | 17,71  |
|                                                                                 | Allergy                             | 3,32    | 2,10  | 15,99  |                                                                                 | Colitis related diseases           | 32,78   | 1,84  | 17,53  |
|                                                                                 | Colitis related diseases            | 33,45   | 1,98  | 15,07  |                                                                                 | Other genitourinary                | 7,32    | 1,81  | 17,27  |
|                                                                                 | Other psychiatric and behavioural   | 9,73    | 1,88  | 14,29  |                                                                                 | Allergy                            | 5,01    | 1,69  | 16,14  |
|                                                                                 | Peripheral neuropathy               | 8,77    | 1,81  | 13,80  |                                                                                 | Deafness hearing loss (D)          | 31,78   | 1,49  | 14,19  |
|                                                                                 | Deafness hearing loss (D)           | 23,41   | 1,58  | 12,03  |                                                                                 | Peripheral neuropathy              | 10,54   | 1,44  | 13,75  |
|                                                                                 | Other respiratory (D)               | 3,44    | 1,49  | 11,32  |                                                                                 | Other respiratory (D)              | 5,04    | 1,26  | 11,96  |
|                                                                                 | Cataract lens (D)                   | 33,60   | 1,36  | 10,35  |                                                                                 | Cataract lens (D)                  | 40,00   | 1,24  | 11,85  |
|                                                                                 | Heart failure                       | 43,08   | 1,18  | 8,97   |                                                                                 | Heart failure                      | 50,35   | 1,19  | 11,35  |
|                                                                                 | COPD, emphysema, chronic bronchitis | 23,74   | 1,14  | 8,70   |                                                                                 | Atrial fibrillation                | 39,69   | 1,13  | 10,73  |

Categories highlighted in red reach the O/E ratio threshold of two or exclusivity  $\geq 30\%$ . Abbreviations: Prev: disease prevalence in the cluster; O/E ratio: observed/expected ratio;

Exc: exclusivity; COPD: chronic obstructive pulmonary; D: Disease category (all other groups correspond to disease-drug).

Categories highlighted in blue correspond to Disease category
