# Supplementary material for: Polypharmacy Patterns in Multimorbid Older People with Cardiovascular Disease: Longitudinal Study
Source: MDPI journal article supplement (doi:10.3390/geriatrics7060141), 2022-12-13
Supplement: s1 [file s1]

Table S2 . Values of laboratory variables determination considered altered

| Analytical variable                         | Altered value                 |              |
|---------------------------------------------|-------------------------------|--------------|
|                                             | less than                     | greater than |
| Alpha-1 antitrypsin (AAT)                   | <85 mg/dL                     | >213 mg/dL   |
| Serum Albumin (ALB_ser)                     | <3.1 g/dL                     | >4.3 g/dL    |
| Total Cholesterol (TCHOL)                   | NA                            | ≥6.22 mmol/L |
| Cretinine (CREAT)                           | <0.6 mg/dL                    | >1.5 mg/dL   |
| Alkaline Phosphatase (ALP)                  | <45 IU/L                      | >115 IU/L    |
| Gamma-Glutamyl Transpeptidase (GGT)         | <7 IU/L                       | >50 IU/L     |
| Aspartate Aminotransferase (AST or SGOT)    | <4 IU/L                       | >40 IU/L     |
| Alanine Transaminase (ALT or SGPT)          | <0 IU/L                       | >40 IU/L     |
| Glycaemia (GLYC)                            | <70 mg/dL                     | >100 mg/dL   |
| Glycosylated Hemoglobin (HbA1c)             | NA                            | ≥6.5%        |
| Estimated Glomerular Filtration Rate (eGFR) | <60 ml/min/1.73m <sup>2</sup> | NA           |

NA: Does not apply
